# Supplementary material for: Development and Validation of Perceived News Media Bias Scale
Source: Research Square preprint supplement (doi:10.21203/rs.3.rs-6732818/v1), 2026-01-30
Supplement: Supplementary file 1 [file 6593200adca02fdb3ef87f28.xlsx]

## Sheet: Sheet1
F1	F2	F3	F4	F5	F6	F7	F8	Year	BP	College	Gender
5	5	5	5	5	5	5	5	2022级	农村	影视与艺术设计学院	女
4	4	4	3	3	3	3	3	2022级	农村	体育学院	男
4	2	4	3	3	4	3	4	2022级	农村	电气信息学院	男
5	5	5	5	5	5	5	5	2022级	农村	电气信息学院	男
4	4	4	4	4	4	4	4	2022级	农村	影视与艺术设计学院	男
3	3	3	3	3	3	3	3	2022级	农村	影视与艺术设计学院	女
4	4	4	4	4	4	4	5	2022级	城镇	影视与艺术设计学院	女
2	3	3	3	3	3	3	3	2022级	城镇	影视与艺术设计学院	男
3	3	3	3	3	3	3	3	2022级	农村	电气信息学院	男
4	4	4	4	4	4	4	4	2022级	农村	影视与艺术设计学院	女
1	3	2	1	2	3	2	1	2022级	农村	工学院	女
4	4	4	4	4	4	4	4	2022级	农村	影视与艺术设计学院	男
3	3	3	3	3	3	3	3	2022级	城镇	电气信息学院	男
4	4	4	4	4	4	4	4	2022级	城镇	工学院	女
3	3	3	3	3	3	3	3	2022级	城镇	工学院	男
4	4	4	4	4	4	4	4	2022级	城镇	影视与艺术设计学院	女
4	4	4	4	4	4	4	4	2022级	农村	工学院	女
3	3	3	3	3	3	3	3	2022级	农村	影视与艺术设计学院	女
4	2	1	3	2	3	2	3	2022级	农村	影视与艺术设计学院	女
4	4	4	4	4	3	4	4	2022级	城镇	工学院	男
3	3	3	4	4	4	4	4	2022级	城镇	工学院	女
3	3	3	3	3	3	3	3	2022级	城镇	影视与艺术设计学院	女
4	4	4	4	4	4	4	4	2022级	农村	影视与艺术设计学院	女
3	3	3	3	3	3	3	3	2022级	农村	工学院	女
4	4	4	4	4	4	4	4	2022级	农村	工学院	女
3	3	3	3	3	3	3	3	2022级	农村	影视与艺术设计学院	女
4	4	4	4	4	4	4	4	2022级	农村	工学院	男
4	4	4	4	4	4	4	4	2022级	农村	商学院	女
5	5	5	4	4	4	4	4	2022级	城镇	体育学院	女
4	4	4	4	4	4	4	4	2022级	农村	工学院	女
5	5	5	5	5	5	5	5	2022级	农村	工学院	男
3	3	3	3	3	3	3	3	2022级	城镇	影视与艺术设计学院	女
3	3	4	4	3	3	4	3	2022级	农村	影视与艺术设计学院	男
3	3	3	3	5	1	2	3	2022级	农村	影视与艺术设计学院	男
4	4	4	4	4	4	4	4	2022级	农村	影视与艺术设计学院	男
3	3	3	3	3	3	3	3	2022级	农村	影视与艺术设计学院	女
3	3	3	3	3	3	3	3	2022级	农村	商学院	女
3	3	3	3	3	3	3	3	2022级	城镇	影视与艺术设计学院	女
3	3	3	3	3	3	3	3	2022级	农村	工学院	女
3	3	3	3	3	3	3	3	2022级	城镇	影视与艺术设计学院	女
3	3	3	3	3	3	3	3	2022级	农村	影视与艺术设计学院	男
3	3	3	3	3	3	3	3	2022级	农村	商学院	女
3	3	3	3	3	3	3	3	2022级	城镇	工学院	男
4	4	4	4	4	4	4	4	2022级	农村	工学院	男
4	3	3	2	3	4	3	3	2022级	农村	工学院	女
4	3	4	4	4	4	4	4	2022级	城镇	工学院	男
3	3	3	3	3	3	3	3	2022级	农村	影视与艺术设计学院	女
4	4	4	3	3	4	3	3	2022级	农村	工学院	女
3	3	3	3	3	3	3	3	2022级	农村	影视与艺术设计学院	男
4	4	4	4	4	4	4	4	2022级	城镇	影视与艺术设计学院	女
4	4	3	3	3	3	3	3	2022级	农村	国际语言学院	女
3	3	3	3	3	3	3	3	2022级	农村	影视与艺术设计学院	男
3	3	3	3	3	3	3	3	2022级	农村	影视与艺术设计学院	女
3	4	3	3	4	3	3	3	2022级	城镇	影视与艺术设计学院	男
5	5	5	5	5	5	5	5	2022级	城镇	工学院	男
4	3	3	3	3	3	3	3	2022级	城镇	影视与艺术设计学院	女
3	3	3	3	3	3	3	3	2022级	农村	影视与艺术设计学院	女
3	3	3	3	3	3	3	3	2022级	农村	体育学院	女
3	3	2	3	4	3	3	3	2022级	城镇	工学院	男
3	3	3	3	3	3	3	3	2022级	农村	工学院	男
3	3	4	3	3	3	3	3	2022级	城镇	影视与艺术设计学院	男
4	4	4	4	4	4	4	4	2022级	城镇	体育学院	女
3	3	3	3	3	3	3	3	2022级	农村	工学院	男
3	3	3	3	3	3	3	3	2022级	农村	影视与艺术设计学院	女
3	3	3	3	3	3	3	3	2022级	农村	体育学院	男
3	3	3	3	3	3	3	3	2022级	农村	体育学院	女
3	3	3	3	3	3	3	3	2022级	城镇	影视与艺术设计学院	女
3	3	3	3	3	3	3	3	2022级	农村	体育学院	男
3	4	4	4	4	4	3	3	2022级	农村	体育学院	男
3	3	3	3	3	3	3	3	2022级	农村	工学院	女
2	2	2	2	2	2	3	3	2022级	农村	工学院	女
4	3	4	4	4	4	5	5	2022级	农村	商学院	男
3	3	3	3	3	3	3	3	2022级	农村	体育学院	男
3	3	3	3	3	3	3	3	2022级	农村	影视与艺术设计学院	女
3	3	3	3	3	3	3	3	2022级	农村	商学院	女
4	4	4	4	4	4	4	4	2022级	城镇	体育学院	女
4	4	3	3	4	3	3	3	2022级	农村	体育学院	男
3	3	3	3	3	3	3	3	2022级	农村	影视与艺术设计学院	女
3	3	3	3	3	3	3	3	2022级	农村	影视与艺术设计学院	女
3	3	3	3	3	3	3	3	2022级	农村	体育学院	男
4	4	4	3	3	3	3	3	2022级	农村	商学院	女
3	3	3	3	3	3	3	3	2022级	农村	国际语言学院	女
5	5	5	5	5	5	5	5	2022级	农村	工学院	女
3	3	3	3	3	3	3	3	2022级	农村	体育学院	女
3	3	3	3	3	3	3	3	2022级	城镇	电气信息学院	男
4	4	4	4	4	4	4	4	2022级	城镇	工学院	男
2	2	2	2	2	2	2	2	2022级	农村	国际语言学院	女
3	3	3	3	3	3	3	3	2022级	农村	国际语言学院	女
4	4	4	4	4	4	4	4	2022级	城镇	电气信息学院	女
3	3	3	3	3	3	3	3	2022级	城镇	国际语言学院	女
3	4	4	3	3	4	4	3	2022级	农村	国际语言学院	女
3	3	3	3	3	3	3	3	2022级	农村	国际语言学院	女
4	4	4	4	4	4	4	4	2022级	农村	体育学院	男
3	3	3	3	3	3	3	3	2022级	城镇	国际语言学院	女
3	3	3	3	3	3	3	3	2022级	农村	工学院	男
3	3	3	3	3	3	3	3	2022级	农村	国际语言学院	女
3	3	3	3	3	3	3	3	2022级	农村	国际语言学院	女
3	3	3	3	3	3	3	3	2022级	农村	国际语言学院	女
4	3	3	3	3	3	3	3	2022级	农村	国际语言学院	女
3	3	3	3	3	3	3	3	2022级	农村	工学院	女
4	4	4	4	4	4	4	4	2022级	农村	国际语言学院	女
3	3	3	3	3	3	3	3	2022级	农村	国际语言学院	女
4	4	4	4	4	4	4	4	2022级	农村	国际语言学院	女
4	3	3	3	3	4	3	3	2022级	农村	国际语言学院	女
4	4	4	4	4	4	4	4	2022级	农村	国际语言学院	女
4	4	4	3	3	3	3	3	2022级	农村	国际语言学院	女
4	2	4	4	3	2	4	3	2022级	农村	国际语言学院	女
3	3	3	3	3	3	3	3	2022级	农村	国际语言学院	女
4	4	4	4	4	4	4	4	2022级	城镇	国际语言学院	女
4	4	3	3	3	4	4	3	2022级	农村	国际语言学院	女
2	2	2	3	2	2	3	2	2022级	农村	国际语言学院	女
3	3	3	3	3	3	3	3	2022级	农村	国际语言学院	女
3	3	3	4	3	3	4	3	2022级	城镇	国际语言学院	女
2	2	2	2	2	2	4	2	2022级	城镇	商学院	女
4	4	4	3	3	3	3	3	2022级	农村	国际语言学院	女
3	3	3	3	3	3	3	3	2022级	农村	国际语言学院	女
3	3	3	3	3	3	3	3	2022级	农村	国际语言学院	女
3	3	3	3	3	3	3	3	2022级	城镇	国际语言学院	女
4	4	3	3	4	3	3	3	2022级	农村	国际语言学院	女
3	3	3	3	3	3	3	3	2022级	农村	国际语言学院	女
4	4	4	4	4	4	4	4	2022级	农村	国际语言学院	女
3	3	3	3	3	3	3	3	2022级	农村	国际语言学院	女
3	3	3	3	3	3	3	3	2022级	农村	国际语言学院	女
3	3	3	3	3	4	3	3	2022级	农村	国际语言学院	女
3	3	3	3	3	3	3	3	2022级	农村	国际语言学院	女
3	3	3	3	3	3	3	3	2022级	农村	国际语言学院	女
3	3	3	3	3	3	3	3	2022级	农村	国际语言学院	女
4	4	4	4	4	4	4	4	2022级	农村	国际语言学院	女
3	3	3	3	3	3	3	3	2022级	农村	国际语言学院	女
3	3	3	3	3	3	3	3	2022级	农村	国际语言学院	女
3	3	3	3	3	3	3	3	2022级	农村	国际语言学院	女
3	3	3	1	1	1	1	1	2022级	农村	国际语言学院	女
3	3	3	3	3	3	3	3	2022级	农村	国际语言学院	女
3	3	3	3	3	3	3	3	2022级	农村	国际语言学院	女
3	3	3	3	3	3	3	3	2022级	农村	国际语言学院	女
3	3	3	3	3	3	3	3	2022级	农村	国际语言学院	女
3	3	3	3	3	3	3	3	2022级	农村	国际语言学院	女
3	3	3	3	3	3	3	3	2022级	农村	国际语言学院	女
3	3	3	3	3	3	3	3	2022级	农村	国际语言学院	女
3	3	3	3	3	3	3	3	2022级	农村	商学院	女
4	4	3	4	3	4	3	3	2022级	农村	国际语言学院	女
4	4	4	3	3	3	4	3	2022级	农村	国际语言学院	女
5	5	5	5	5	5	5	5	2022级	农村	影视与艺术设计学院	女
3	3	3	4	4	4	4	4	2022级	农村	国际语言学院	女
4	3	3	3	3	3	3	3	2022级	农村	影视与艺术设计学院	男
3	3	3	3	3	3	3	3	2022级	农村	国际语言学院	女
3	3	3	3	3	3	3	3	2022级	农村	国际语言学院	女
3	3	3	3	3	3	3	3	2022级	农村	国际语言学院	女
3	3	3	3	3	3	3	3	2022级	农村	国际语言学院	女
3	3	3	3	3	3	3	3	2022级	农村	国际语言学院	女
3	3	3	3	3	3	3	3	2022级	农村	影视与艺术设计学院	女
3	3	3	3	3	3	3	3	2022级	城镇	国际语言学院	女
4	4	4	4	4	4	4	4	2022级	农村	国际语言学院	女
3	3	3	3	3	3	3	3	2022级	城镇	国际语言学院	女
3	3	3	3	3	3	3	3	2022级	城镇	国际语言学院	女
3	3	3	3	3	3	3	3	2022级	城镇	国际语言学院	女
3	4	4	3	3	4	3	3	2022级	农村	国际语言学院	女
3	3	3	3	3	3	3	3	2022级	农村	国际语言学院	女
3	3	3	3	3	3	3	3	2022级	农村	商学院	女
3	3	3	3	3	3	3	3	2022级	农村	国际语言学院	女
3	3	3	3	3	3	3	3	2022级	城镇	国际语言学院	女
3	3	3	3	3	3	3	3	2022级	农村	国际语言学院	女
4	4	4	4	4	4	4	4	2022级	农村	国际语言学院	女
4	4	4	4	4	4	4	4	2022级	农村	国际语言学院	女
4	4	4	4	4	4	4	4	2022级	城镇	国际语言学院	女
3	3	3	3	3	3	3	3	2022级	农村	国际语言学院	女
3	3	3	3	3	3	3	3	2022级	农村	国际语言学院	女
2	2	2	2	2	2	2	2	2022级	农村	国际语言学院	女
3	4	3	4	3	3	3	3	2022级	城镇	国际语言学院	女
3	3	3	3	3	3	3	3	2022级	农村	国际语言学院	女
3	3	3	4	3	3	4	3	2022级	农村	国际语言学院	女
3	3	3	3	3	3	3	3	2022级	农村	国际语言学院	女
4	4	4	4	4	4	4	4	2022级	农村	国际语言学院	女
4	4	4	4	4	4	4	4	2022级	农村	国际语言学院	女
3	3	3	3	3	3	3	3	2022级	农村	国际语言学院	女
2	4	2	3	3	3	4	4	2022级	农村	国际语言学院	女
3	3	3	3	3	3	3	3	2022级	农村	国际语言学院	女
3	3	3	3	3	3	3	3	2022级	农村	国际语言学院	女
4	4	4	3	3	3	3	3	2022级	农村	国际语言学院	女
3	5	5	3	3	3	3	3	2022级	农村	国际语言学院	女
4	4	4	4	4	4	4	4	2022级	农村	国际语言学院	女
4	4	4	3	3	4	4	4	2022级	农村	国际语言学院	女
3	3	3	3	3	3	3	3	2022级	农村	国际语言学院	女
2	3	3	3	3	3	3	3	2022级	农村	电气信息学院	男
4	4	3	3	4	3	3	4	2022级	农村	国际语言学院	女
4	4	4	4	4	4	4	4	2022级	农村	国际语言学院	女
3	3	3	3	3	3	3	3	2022级	农村	国际语言学院	女
3	3	3	3	3	3	3	3	2022级	农村	商学院	女
3	3	3	3	3	3	3	3	2022级	城镇	电气信息学院	女
3	3	3	3	3	3	3	3	2022级	农村	国际语言学院	女
4	4	4	4	4	4	4	4	2022级	农村	国际语言学院	女
3	2	3	3	3	3	3	3	2022级	农村	国际语言学院	女
3	3	3	3	3	3	3	3	2022级	农村	国际语言学院	女
3	3	3	3	3	3	3	3	2022级	农村	国际语言学院	女
3	3	3	3	3	3	3	3	2022级	农村	国际语言学院	女
3	3	3	3	3	3	3	3	2022级	城镇	国际语言学院	女
3	3	3	3	3	3	3	3	2022级	农村	国际语言学院	女
5	5	5	5	5	5	5	5	2022级	农村	国际语言学院	女
3	3	3	3	3	3	3	3	2022级	城镇	国际语言学院	女
4	3	4	4	3	4	3	4	2022级	农村	国际语言学院	女
4	4	4	4	3	4	4	4	2022级	农村	国际语言学院	女
4	4	3	4	3	3	3	4	2022级	农村	国际语言学院	女
3	3	3	3	3	3	3	3	2022级	农村	商学院	女
4	4	4	3	3	3	3	2	2022级	农村	国际语言学院	女
3	3	3	3	3	3	3	3	2022级	城镇	国际语言学院	女
3	3	3	3	3	3	3	3	2022级	农村	国际语言学院	女
3	3	3	4	3	3	3	3	2022级	农村	国际语言学院	女
3	3	3	3	4	3	4	3	2022级	农村	国际语言学院	女
4	3	3	3	3	3	3	3	2022级	农村	国际语言学院	男
3	3	3	3	3	3	3	3	2022级	城镇	国际语言学院	女
4	3	4	3	3	3	3	3	2022级	农村	国际语言学院	女
3	3	3	3	3	3	3	3	2022级	农村	国际语言学院	女
3	3	3	3	3	3	3	3	2022级	农村	国际语言学院	女
3	3	4	4	4	4	4	4	2022级	农村	国际语言学院	女
4	4	4	4	4	4	4	4	2022级	农村	国际语言学院	女
3	3	3	3	3	4	3	4	2022级	农村	国际语言学院	女
3	3	3	3	3	3	3	3	2022级	农村	国际语言学院	女
4	4	4	3	3	3	3	3	2022级	农村	国际语言学院	女
3	3	3	3	3	3	3	3	2022级	农村	国际语言学院	女
3	3	3	3	3	3	3	3	2022级	农村	国际语言学院	女
3	4	4	3	4	3	4	4	2022级	农村	国际语言学院	男
3	3	3	3	3	3	3	3	2022级	农村	工学院	男
3	3	3	3	3	3	3	3	2022级	农村	工学院	女
3	3	3	3	3	3	3	3	2022级	城镇	国际语言学院	女
3	3	3	3	3	3	3	3	2022级	城镇	商学院	女
3	3	3	3	3	3	3	3	2022级	城镇	国际语言学院	女
4	4	4	3	3	3	3	3	2022级	农村	国际语言学院	女
3	3	3	3	3	3	3	3	2022级	农村	国际语言学院	女
4	4	4	4	4	4	4	4	2022级	城镇	国际语言学院	女
3	3	3	3	3	3	3	3	2022级	城镇	国际语言学院	女
3	3	3	3	3	3	3	3	2022级	城镇	国际语言学院	女
3	3	3	3	3	3	3	3	2022级	农村	国际语言学院	女
3	3	3	3	3	3	3	3	2022级	农村	国际语言学院	女
4	4	4	4	4	4	4	4	2022级	农村	国际语言学院	女
4	4	3	4	3	3	3	3	2022级	城镇	国际语言学院	女
4	4	4	4	4	4	4	4	2022级	城镇	国际语言学院	女
4	4	4	3	4	3	2	2	2022级	农村	国际语言学院	女
3	3	3	2	2	2	2	2	2022级	农村	国际语言学院	女
3	3	3	3	3	3	3	3	2022级	农村	国际语言学院	女
3	3	3	3	3	3	3	3	2022级	农村	工学院	女
4	4	4	4	4	4	4	4	2022级	农村	国际语言学院	女
3	3	3	3	3	3	3	3	2022级	农村	国际语言学院	女
3	3	3	4	4	4	4	4	2022级	农村	国际语言学院	女
4	4	4	4	4	4	4	4	2022级	农村	国际语言学院	女
3	3	4	4	3	4	3	4	2022级	农村	国际语言学院	女
3	3	3	3	3	3	3	3	2022级	城镇	国际语言学院	女
3	3	3	3	3	3	3	3	2022级	城镇	国际语言学院	男
3	3	3	3	3	3	3	3	2022级	农村	国际语言学院	女
3	3	3	3	3	3	3	3	2022级	农村	国际语言学院	女
2	4	2	2	2	4	4	2	2022级	农村	国际语言学院	女
4	4	4	4	4	4	4	4	2022级	农村	国际语言学院	女
3	3	3	3	3	3	3	3	2022级	农村	国际语言学院	女
3	3	3	3	3	3	3	3	2022级	农村	国际语言学院	女
3	3	3	3	3	3	3	3	2022级	农村	国际语言学院	女
4	3	3	4	4	4	4	4	2022级	农村	国际语言学院	女
4	4	4	4	4	4	4	4	2022级	农村	国际语言学院	女
3	3	3	3	3	3	3	3	2022级	城镇	国际语言学院	女
5	5	5	5	5	5	5	5	2022级	农村	国际语言学院	女
3	3	3	3	3	3	3	2	2022级	农村	国际语言学院	女
3	3	3	3	3	3	3	3	2022级	农村	国际语言学院	女
5	5	5	5	5	5	5	5	2022级	农村	国际语言学院	女
4	4	4	4	4	3	4	4	2022级	农村	影视与艺术设计学院	女
3	3	3	3	3	3	3	3	2022级	农村	国际语言学院	女
5	5	5	5	5	5	5	5	2022级	农村	国际语言学院	女
3	3	3	3	3	3	3	3	2022级	农村	国际语言学院	女
3	3	3	3	3	3	3	3	2022级	城镇	工学院	女
3	3	3	3	3	3	3	3	2022级	农村	影视与艺术设计学院	女
3	3	3	3	3	3	3	3	2022级	农村	国际语言学院	女
4	4	5	4	4	4	3	4	2022级	城镇	国际语言学院	女
4	4	4	4	4	4	4	4	2022级	农村	国际语言学院	女
4	4	4	4	4	4	4	4	2022级	农村	国际语言学院	女
4	3	3	4	3	3	3	3	2022级	农村	国际语言学院	女
3	3	3	3	3	3	3	3	2022级	城镇	国际语言学院	女
3	3	3	3	3	3	3	3	2022级	农村	国际语言学院	女
3	3	3	3	3	3	3	3	2022级	农村	国际语言学院	女
3	3	3	3	2	3	3	3	2022级	农村	国际语言学院	男
2	3	2	3	3	4	3	3	2022级	农村	国际语言学院	女
3	3	3	3	3	3	3	3	2022级	农村	国际语言学院	女
4	4	4	4	4	4	4	4	2022级	农村	工学院	女
4	4	4	4	3	3	3	3	2022级	农村	国际语言学院	女
3	3	3	3	4	4	4	4	2022级	城镇	工学院	女
3	3	3	3	3	3	3	3	2022级	城镇	国际语言学院	女
3	3	3	3	3	3	3	3	2022级	农村	国际语言学院	女
4	4	4	4	4	4	4	4	2022级	农村	商学院	女
4	4	4	4	4	4	4	4	2022级	城镇	商学院	女
4	4	3	4	3	4	4	4	2022级	农村	国际语言学院	女
4	4	4	3	3	3	2	3	2022级	农村	国际语言学院	男
3	3	3	3	3	3	3	3	2022级	农村	电气信息学院	女
4	4	4	3	3	3	3	3	2022级	农村	商学院	女
2	2	2	5	5	5	5	5	2022级	农村	国际语言学院	女
3	3	3	3	3	3	3	3	2022级	农村	国际语言学院	女
4	4	4	4	2	4	4	4	2022级	农村	国际语言学院	女
4	4	4	4	4	4	4	4	2022级	城镇	国际语言学院	女
3	3	3	3	3	3	3	3	2022级	城镇	国际语言学院	女
4	4	4	2	2	3	4	3	2022级	农村	国际语言学院	女
3	4	4	4	4	4	4	4	2022级	农村	国际语言学院	女
3	3	3	3	3	3	3	3	2022级	农村	国际语言学院	女
3	3	3	3	3	3	3	3	2022级	农村	国际语言学院	女
3	3	3	3	2	4	2	3	2022级	农村	电气信息学院	女
4	4	4	4	5	4	5	4	2022级	农村	国际语言学院	女
4	4	4	4	4	4	4	4	2022级	农村	国际语言学院	女
3	3	3	3	3	3	3	3	2022级	农村	国际语言学院	女
3	3	3	3	3	3	3	3	2022级	农村	国际语言学院	女
4	4	4	4	4	4	4	4	2022级	农村	国际语言学院	女
5	5	5	5	5	5	5	5	2022级	农村	工学院	女
3	3	3	3	3	3	3	3	2022级	农村	国际语言学院	女
4	4	4	4	5	4	4	4	2022级	农村	国际语言学院	女
3	3	3	3	3	3	3	3	2022级	城镇	国际语言学院	女
3	3	3	3	3	3	3	3	2022级	农村	体育学院	男
4	4	4	4	4	4	4	4	2022级	农村	国际语言学院	女
3	3	3	3	3	3	3	3	2022级	农村	国际语言学院	女
4	4	4	4	4	4	4	4	2022级	农村	国际语言学院	女
3	3	3	3	3	3	3	3	2022级	农村	国际语言学院	女
3	3	3	3	3	3	3	3	2022级	农村	国际语言学院	女
3	3	4	3	4	4	3	4	2022级	农村	国际语言学院	女
3	3	3	3	3	3	3	3	2022级	城镇	国际语言学院	女
3	3	3	3	3	3	3	3	2022级	农村	国际语言学院	女
3	3	3	3	3	3	3	3	2022级	农村	体育学院	女
4	4	4	3	3	3	3	3	2022级	城镇	电气信息学院	女
3	3	3	3	3	3	3	3	2022级	农村	商学院	女
2	2	3	2	3	2	3	2	2022级	农村	国际语言学院	女
3	3	3	3	3	3	3	3	2022级	农村	影视与艺术设计学院	女
3	3	3	3	3	3	3	3	2022级	农村	国际语言学院	女
3	3	3	3	3	3	3	3	2022级	城镇	国际语言学院	女
3	3	3	3	3	3	3	3	2022级	农村	国际语言学院	女
3	3	3	3	3	3	3	3	2022级	农村	国际语言学院	女
4	4	4	3	4	4	4	4	2022级	城镇	国际语言学院	女
4	4	4	3	3	3	3	3	2022级	农村	影视与艺术设计学院	女
3	3	3	3	3	3	3	3	2022级	农村	国际语言学院	女
3	3	3	3	3	3	3	3	2022级	农村	国际语言学院	女
4	5	5	4	5	4	4	5	2022级	农村	工学院	女
3	3	3	3	3	3	3	3	2022级	农村	国际语言学院	女
4	3	3	2	3	3	4	3	2022级	农村	工学院	男
3	3	3	3	3	3	3	3	2022级	农村	国际语言学院	女
4	4	4	4	4	4	4	4	2022级	城镇	国际语言学院	女
4	4	4	4	4	4	4	4	2022级	农村	国际语言学院	女
3	3	3	2	2	2	2	2	2022级	城镇	国际语言学院	女
4	4	4	4	4	4	4	4	2022级	农村	国际语言学院	女
4	4	4	4	4	4	4	4	2022级	城镇	电气信息学院	男
3	4	3	3	3	2	3	2	2022级	城镇	国际语言学院	男
4	4	4	4	4	4	4	4	2022级	农村	国际语言学院	女
2	2	2	4	3	3	3	3	2022级	农村	商学院	女
3	3	3	3	3	3	3	3	2022级	城镇	国际语言学院	女
3	3	3	3	3	3	3	3	2022级	农村	国际语言学院	女
3	3	3	3	3	3	3	3	2022级	农村	国际语言学院	女
3	3	3	3	3	3	3	3	2022级	城镇	商学院	男
4	4	3	4	3	3	3	3	2022级	农村	电气信息学院	男
4	4	4	4	4	4	4	4	2022级	农村	影视与艺术设计学院	女
3	3	3	2	2	2	2	2	2022级	城镇	国际语言学院	女
4	4	4	4	4	4	4	4	2022级	城镇	影视与艺术设计学院	女
3	3	3	2	3	3	4	4	2022级	城镇	商学院	女
3	3	3	3	3	3	3	3	2022级	农村	国际语言学院	女
2	2	2	3	3	3	2	2	2022级	农村	国际语言学院	女
4	4	4	4	4	4	4	4	2022级	农村	国际语言学院	女
3	3	3	3	3	3	3	3	2022级	城镇	国际语言学院	女
4	4	4	4	4	4	4	4	2022级	农村	国际语言学院	女
4	4	4	4	4	4	4	4	2021级	城镇	国际语言学院	女
5	5	5	5	5	5	5	5	2022级	农村	工学院	女
4	4	4	4	3	4	3	4	2021级	农村	国际语言学院	男
4	4	4	4	4	4	4	4	2021级	农村	国际语言学院	女
2	3	3	3	3	3	2	2	2021级	农村	国际语言学院	女
2	3	3	3	3	4	4	3	2022级	城镇	国际语言学院	女
5	5	5	4	5	5	4	5	2022级	农村	国际语言学院	女
4	4	4	4	4	4	4	4	2021级	农村	国际语言学院	女
3	3	3	3	3	3	3	3	2021级	城镇	国际语言学院	女
3	3	3	3	3	3	3	3	2021级	农村	国际语言学院	女
5	3	4	4	3	4	3	4	2022级	农村	国际语言学院	女
4	4	4	3	3	3	3	3	2022级	农村	电气信息学院	男
4	4	4	4	4	4	4	4	2021级	农村	国际语言学院	女
3	3	3	3	3	3	3	3	2021级	农村	国际语言学院	女
4	4	3	3	4	3	3	4	2021级	农村	国际语言学院	女
3	4	3	4	2	3	4	4	2021级	城镇	国际语言学院	女
3	3	3	3	4	3	4	3	2021级	农村	国际语言学院	男
3	3	3	3	3	3	3	3	2021级	农村	国际语言学院	女
3	3	3	3	3	3	4	3	2021级	农村	国际语言学院	女
3	3	3	3	3	3	3	3	2021级	农村	国际语言学院	女
3	3	3	3	3	3	3	3	2021级	农村	国际语言学院	女
3	3	3	3	3	3	3	3	2021级	农村	国际语言学院	女
3	3	3	3	4	3	4	3	2021级	农村	国际语言学院	女
3	3	3	3	4	4	3	3	2021级	农村	国际语言学院	男
3	3	3	3	3	3	3	3	2022级	农村	工学院	男
4	4	4	4	4	4	4	4	2021级	城镇	国际语言学院	女
4	4	4	3	3	3	3	3	2022级	农村	国际语言学院	女
4	3	4	4	3	3	3	4	2022级	城镇	工学院	女
3	3	3	3	3	3	3	3	2022级	农村	国际语言学院	女
4	4	4	4	4	4	4	4	2021级	农村	国际语言学院	女
4	4	3	4	4	4	4	4	2022级	农村	国际语言学院	女
5	5	5	5	4	4	4	4	2022级	农村	国际语言学院	女
3	3	3	3	3	3	4	4	2022级	农村	国际语言学院	女
3	3	3	3	3	3	3	3	2021级	城镇	国际语言学院	女
3	3	3	4	2	3	3	3	2021级	农村	国际语言学院	女
3	3	4	3	4	3	4	3	2021级	城镇	国际语言学院	女
5	5	5	5	5	5	5	5	2021级	城镇	国际语言学院	女
4	4	4	4	4	4	4	4	2021级	城镇	国际语言学院	女
4	5	5	5	5	5	5	5	2022级	农村	国际语言学院	女
3	3	3	3	5	4	3	3	2022级	农村	国际语言学院	女
4	4	4	4	4	4	4	4	2021级	城镇	国际语言学院	女
4	4	4	3	3	3	3	3	2022级	农村	国际语言学院	女
3	3	3	3	4	4	3	3	2022级	农村	商学院	女
3	3	4	3	4	3	4	3	2022级	城镇	国际语言学院	女
3	3	3	3	3	3	3	3	2022级	农村	国际语言学院	女
3	4	4	3	3	3	3	3	2022级	农村	国际语言学院	女
3	3	3	3	3	3	3	3	2022级	农村	国际语言学院	女
4	4	3	4	3	4	2	4	2022级	农村	国际语言学院	女
4	4	4	4	4	4	4	4	2021级	农村	国际语言学院	女
4	4	4	4	3	4	4	4	2021级	城镇	国际语言学院	男
4	4	4	4	4	4	4	4	2022级	农村	国际语言学院	女
4	4	2	4	2	4	2	4	2022级	农村	国际语言学院	女
4	3	3	5	3	5	3	5	2021级	农村	国际语言学院	女
5	5	5	5	5	5	5	5	2021级	城镇	国际语言学院	女
4	4	4	4	4	4	4	4	2022级	农村	国际语言学院	女
5	5	5	5	5	5	5	5	2022级	农村	体育学院	男
4	4	4	4	4	4	4	4	2021级	城镇	国际语言学院	女
3	3	3	4	4	4	4	4	2021级	农村	国际语言学院	女
3	3	3	3	3	3	3	3	2022级	城镇	国际语言学院	女
4	4	4	3	3	3	3	3	2021级	农村	国际语言学院	女
3	3	4	4	4	5	4	2	2021级	城镇	国际语言学院	女
4	4	4	4	4	4	4	4	2022级	城镇	国际语言学院	女
3	3	3	3	3	3	3	3	2022级	农村	商学院	女
4	3	3	4	4	4	4	4	2021级	农村	国际语言学院	女
4	4	3	4	4	4	4	4	2022级	农村	国际语言学院	女
3	3	3	3	3	3	3	3	2022级	农村	国际语言学院	女
3	3	3	3	3	3	3	3	2022级	城镇	影视与艺术设计学院	女
2	2	2	2	2	2	2	2	2022级	城镇	工学院	女
3	3	3	3	3	3	3	3	2022级	城镇	电气信息学院	男
3	3	3	3	3	3	4	4	2022级	农村	国际语言学院	女
3	3	4	4	4	3	4	3	2022级	农村	国际语言学院	女
2	3	1	2	1	2	4	4	2021级	农村	国际语言学院	女
5	5	5	5	5	5	5	5	2022级	农村	国际语言学院	女
3	3	3	3	3	3	3	3	2022级	农村	国际语言学院	女
4	4	4	4	4	4	4	4	2022级	农村	国际语言学院	女
5	5	5	5	5	5	5	5	2022级	农村	国际语言学院	女
3	3	3	3	3	3	3	3	2022级	农村	国际语言学院	女
3	3	3	3	3	3	3	3	2022级	农村	商学院	女
4	4	4	4	4	4	4	4	2021级	农村	国际语言学院	女
3	3	3	3	3	3	3	3	2022级	农村	国际语言学院	女
4	4	4	3	4	3	4	3	2022级	农村	影视与艺术设计学院	女
2	3	3	3	3	3	3	3	2021级	农村	国际语言学院	女
4	4	4	3	3	3	3	3	2022级	农村	国际语言学院	女
4	3	4	3	4	3	4	3	2022级	城镇	国际语言学院	女
3	3	3	3	3	3	3	3	2022级	农村	国际语言学院	女
4	4	4	3	3	3	3	3	2022级	农村	国际语言学院	女
3	3	3	3	3	3	3	3	2022级	农村	商学院	男
4	4	4	4	4	4	4	4	2021级	农村	国际语言学院	女
2	4	4	2	2	2	4	4	2022级	城镇	影视与艺术设计学院	男
4	4	4	4	4	3	3	3	2022级	农村	影视与艺术设计学院	女
3	5	5	4	4	4	4	4	2022级	农村	电气信息学院	男
3	5	4	4	4	4	4	4	2021级	农村	国际语言学院	男
5	5	5	5	5	5	5	5	2022级	农村	国际语言学院	女
4	4	4	4	4	4	4	4	2022级	农村	国际语言学院	女
5	5	5	4	4	4	4	4	2022级	城镇	影视与艺术设计学院	男
4	4	4	4	4	4	4	4	2022级	农村	国际语言学院	女
4	4	4	4	4	4	4	4	2022级	农村	国际语言学院	女
5	5	5	5	5	5	5	5	2022级	城镇	商学院	女
5	5	5	5	5	5	5	5	2021级	农村	国际语言学院	女
4	4	4	4	4	4	4	4	2021级	农村	国际语言学院	女
5	5	5	5	5	5	5	5	2021级	农村	国际语言学院	女
3	3	3	3	3	3	3	3	2021级	农村	国际语言学院	女
4	4	4	3	3	3	3	3	2021级	农村	国际语言学院	女
3	4	4	4	3	4	4	3	2021级	农村	国际语言学院	女
3	3	3	3	3	3	3	3	2022级	城镇	影视与艺术设计学院	女
4	4	4	4	4	4	4	4	2021级	农村	国际语言学院	女
3	3	3	2	3	4	3	3	2022级	农村	国际语言学院	女
3	3	3	3	3	3	3	3	2021级	城镇	国际语言学院	女
3	3	3	3	3	3	3	3	2022级	农村	国际语言学院	女
5	5	5	5	5	5	5	5	2021级	农村	国际语言学院	女
3	5	4	4	4	4	4	4	2022级	农村	国际语言学院	女
3	3	3	3	3	3	3	3	2021级	农村	国际语言学院	女
2	2	2	2	2	2	2	2	2022级	农村	国际语言学院	女
3	3	3	3	3	3	3	3	2022级	农村	影视与艺术设计学院	女
3	3	3	3	3	3	3	3	2022级	农村	商学院	女
3	3	3	3	3	3	3	3	2021级	城镇	国际语言学院	女
3	3	3	3	3	3	3	3	2022级	农村	影视与艺术设计学院	女
3	3	3	3	3	3	3	3	2022级	城镇	影视与艺术设计学院	女
3	3	3	3	3	3	3	3	2022级	农村	国际语言学院	女
4	4	4	4	4	4	4	4	2021级	农村	国际语言学院	男
5	5	4	4	3	3	3	3	2022级	农村	电气信息学院	女
3	3	3	3	3	3	3	3	2022级	农村	国际语言学院	女
4	4	4	4	4	4	4	4	2022级	城镇	国际语言学院	女
3	3	3	3	3	3	3	3	2022级	农村	国际语言学院	女
4	4	3	4	4	3	4	3	2022级	农村	国际语言学院	女
4	4	4	4	4	4	4	4	2022级	农村	工学院	女
3	3	3	3	4	4	4	3	2022级	农村	电气信息学院	男
3	3	3	3	3	3	3	3	2022级	农村	商学院	女
4	3	3	3	3	3	3	3	2022级	农村	国际语言学院	女
4	4	4	4	4	4	4	4	2022级	农村	国际语言学院	女
3	3	3	3	3	3	3	3	2022级	农村	国际语言学院	女
4	4	4	4	4	4	4	4	2022级	农村	国际语言学院	女
3	4	4	4	4	4	4	4	2022级	农村	国际语言学院	女
3	3	3	3	3	4	3	3	2022级	农村	国际语言学院	女
3	4	4	3	4	4	4	3	2021级	农村	国际语言学院	女
4	4	4	4	4	4	4	4	2022级	城镇	国际语言学院	女
3	3	3	3	3	3	3	3	2022级	农村	国际语言学院	女
5	5	5	5	5	5	5	5	2022级	城镇	国际语言学院	女
4	4	4	4	4	4	4	4	2022级	农村	工学院	女
3	3	3	3	3	3	3	3	2022级	农村	工学院	女
3	3	3	3	3	3	3	3	2021级	农村	国际语言学院	女
4	4	4	4	4	4	4	4	2022级	农村	电气信息学院	女
3	3	3	3	3	3	3	3	2022级	农村	国际语言学院	女
3	3	3	3	3	3	3	3	2022级	农村	国际语言学院	女
4	4	4	4	4	4	4	4	2022级	农村	国际语言学院	女
4	4	4	3	3	3	3	3	2022级	农村	国际语言学院	女
3	2	2	3	2	3	3	3	2022级	农村	国际语言学院	女
3	3	3	3	3	3	3	3	2022级	农村	商学院	女
3	3	3	3	3	3	3	3	2021级	农村	国际语言学院	女
4	4	4	4	4	4	4	4	2022级	农村	工学院	女
4	4	4	3	3	3	3	3	2022级	农村	电气信息学院	男
3	3	3	3	3	3	3	3	2022级	农村	电气信息学院	男
3	3	3	3	3	3	3	3	2022级	农村	国际语言学院	女
5	5	5	5	5	5	5	5	2022级	农村	影视与艺术设计学院	女
5	5	5	5	5	5	5	5	2022级	农村	影视与艺术设计学院	女
3	3	3	3	3	3	3	3	2022级	农村	国际语言学院	男
5	3	5	5	3	5	3	5	2022级	农村	国际语言学院	女
4	4	4	3	3	4	4	4	2022级	农村	影视与艺术设计学院	女
4	4	4	4	4	4	4	4	2022级	农村	国际语言学院	女
3	3	3	3	3	3	3	3	2022级	农村	国际语言学院	女
4	4	4	4	4	4	4	4	2022级	农村	国际语言学院	女
3	3	3	3	3	3	3	3	2022级	农村	国际语言学院	男
4	4	4	4	4	4	4	4	2022级	城镇	国际语言学院	女
4	4	4	3	3	4	4	4	2022级	农村	电气信息学院	女
3	3	3	3	3	3	3	3	2022级	农村	影视与艺术设计学院	女
4	4	4	4	4	4	4	4	2022级	农村	国际语言学院	女
3	3	3	3	3	3	3	3	2022级	城镇	影视与艺术设计学院	女
3	3	3	3	3	3	3	3	2022级	农村	电气信息学院	女
4	4	4	3	4	3	4	3	2022级	农村	国际语言学院	女
3	3	3	3	3	3	3	3	2022级	农村	工学院	女
4	4	4	3	3	3	3	3	2022级	农村	商学院	女
4	4	4	4	4	4	4	4	2021级	农村	国际语言学院	女
4	4	4	4	4	4	4	4	2022级	城镇	电气信息学院	男
3	3	3	3	3	3	3	3	2021级	农村	国际语言学院	女
3	3	4	3	4	3	4	4	2022级	农村	国际语言学院	女
3	3	3	3	3	3	3	3	2022级	农村	国际语言学院	女
4	4	3	4	4	4	4	4	2022级	城镇	影视与艺术设计学院	女
3	3	2	3	2	3	2	3	2022级	农村	电气信息学院	女
3	4	4	3	4	4	4	4	2022级	城镇	国际语言学院	女
4	4	3	4	3	4	3	4	2022级	农村	商学院	男
4	4	4	4	4	4	4	4	2022级	农村	国际语言学院	女
3	3	3	3	3	3	3	3	2022级	农村	国际语言学院	女
4	4	4	4	4	4	4	4	2022级	农村	商学院	女
3	3	3	3	3	3	3	3	2022级	城镇	电气信息学院	女
4	4	4	4	4	4	4	4	2022级	农村	国际语言学院	女
4	4	4	4	4	4	5	4	2022级	城镇	工学院	男
3	3	3	3	3	3	3	3	2022级	农村	工学院	女
3	3	3	3	3	3	3	3	2022级	农村	工学院	男
3	3	3	3	3	3	3	3	2022级	农村	国际语言学院	女
4	4	4	4	4	4	4	4	2022级	城镇	国际语言学院	女
3	3	3	3	3	3	3	3	2022级	农村	电气信息学院	女
3	3	3	3	3	3	3	3	2022级	农村	国际语言学院	女
2	2	2	3	3	3	3	3	2022级	农村	国际语言学院	女
3	3	4	5	4	5	4	4	2021级	农村	国际语言学院	女
4	4	4	4	4	4	4	4	2022级	农村	影视与艺术设计学院	女
3	3	3	3	3	3	3	3	2022级	城镇	国际语言学院	女
3	3	3	3	3	3	3	3	2021级	农村	国际语言学院	女
4	4	4	4	3	4	3	4	2022级	农村	国际语言学院	女
3	3	3	3	3	3	3	3	2021级	农村	国际语言学院	女
3	3	3	3	4	4	4	4	2022级	城镇	工学院	男
4	4	4	4	4	4	4	4	2021级	农村	国际语言学院	女
3	3	3	3	3	3	3	3	2022级	农村	国际语言学院	女
3	3	4	4	4	3	4	3	2022级	城镇	影视与艺术设计学院	女
5	5	5	5	5	5	5	5	2021级	农村	国际语言学院	女
3	2	2	3	3	4	4	1	2022级	农村	工学院	女
4	4	4	4	4	4	4	4	2022级	农村	工学院	男
3	3	3	3	3	3	3	3	2022级	城镇	电气信息学院	男
3	3	3	3	3	3	3	3	2022级	城镇	工学院	男
3	3	3	3	3	3	3	3	2022级	农村	国际语言学院	女
3	3	3	3	3	3	3	3	2022级	城镇	电气信息学院	女
4	4	4	4	4	4	4	4	2022级	城镇	工学院	女
3	3	3	3	3	3	3	3	2022级	农村	商学院	女
3	3	3	3	3	3	3	3	2022级	农村	影视与艺术设计学院	女
3	3	3	3	3	3	3	3	2022级	农村	影视与艺术设计学院	女
4	4	4	4	4	4	4	4	2022级	农村	国际语言学院	女
3	3	3	3	3	3	3	3	2022级	农村	影视与艺术设计学院	女
4	3	3	4	3	3	3	3	2021级	农村	国际语言学院	女
3	3	3	3	3	3	3	3	2022级	农村	电气信息学院	女
4	4	3	3	4	3	3	4	2022级	农村	商学院	女
3	3	4	3	3	4	4	4	2022级	农村	影视与艺术设计学院	女
3	3	3	3	3	3	3	3	2022级	农村	商学院	女
3	3	3	3	3	3	3	3	2022级	农村	国际语言学院	女
3	3	3	3	3	3	3	3	2022级	农村	国际语言学院	女
4	4	4	3	4	3	3	3	2022级	城镇	国际语言学院	女
4	4	4	4	4	3	4	4	2022级	城镇	国际语言学院	女
3	3	3	3	3	3	3	3	2022级	农村	国际语言学院	女
4	3	3	3	3	3	3	3	2022级	农村	体育学院	女
3	3	3	3	3	3	3	3	2022级	农村	影视与艺术设计学院	女
3	3	3	3	4	3	3	3	2022级	农村	工学院	男
3	3	3	3	3	3	3	3	2022级	农村	商学院	女
4	2	3	4	3	3	3	3	2022级	农村	国际语言学院	女
3	3	3	3	3	3	3	3	2022级	农村	影视与艺术设计学院	女
3	3	3	3	3	3	3	3	2022级	农村	影视与艺术设计学院	女
4	3	4	3	4	2	4	4	2022级	农村	体育学院	女
4	4	4	4	4	4	4	4	2022级	农村	影视与艺术设计学院	女
4	4	4	3	3	3	3	3	2022级	农村	影视与艺术设计学院	女
4	4	4	3	3	3	3	3	2022级	农村	国际语言学院	女
4	4	4	4	4	4	4	4	2022级	农村	影视与艺术设计学院	女
4	4	4	4	4	4	4	3	2022级	农村	影视与艺术设计学院	女
3	3	3	3	3	3	3	3	2022级	农村	商学院	女
4	4	4	3	5	5	4	4	2022级	农村	国际语言学院	女
3	3	3	3	3	3	3	3	2022级	农村	影视与艺术设计学院	女
3	3	3	3	3	3	3	3	2022级	农村	商学院	女
4	4	4	4	4	4	4	4	2022级	农村	商学院	女
4	4	4	4	4	4	4	4	2022级	农村	国际语言学院	女
3	4	3	4	4	4	4	3	2022级	城镇	国际语言学院	女
5	4	3	3	3	4	3	4	2022级	农村	影视与艺术设计学院	女
4	4	4	4	4	4	4	4	2022级	农村	国际语言学院	女
4	4	3	4	3	4	3	4	2022级	农村	国际语言学院	女
3	3	3	3	3	3	3	3	2022级	农村	电气信息学院	女
3	3	3	3	3	3	3	3	2022级	城镇	影视与艺术设计学院	男
4	4	4	4	4	4	4	4	2022级	城镇	电气信息学院	女
2	4	2	4	2	4	4	4	2022级	农村	工学院	男
3	3	3	3	3	3	3	3	2022级	农村	工学院	女
3	3	3	3	3	3	3	3	2022级	农村	工学院	女
3	3	3	4	4	4	4	4	2022级	农村	国际语言学院	女
5	5	5	5	5	5	5	5	2022级	城镇	工学院	男
3	3	3	3	3	3	3	3	2022级	农村	工学院	男
5	5	5	5	5	5	5	5	2022级	农村	工学院	男
3	4	3	3	4	3	3	4	2022级	城镇	体育学院	女
3	3	3	3	3	3	3	3	2022级	城镇	影视与艺术设计学院	女
4	4	4	4	4	4	4	4	2022级	城镇	商学院	女
3	3	3	3	3	3	3	3	2022级	农村	国际语言学院	男
3	3	3	3	3	3	3	3	2022级	城镇	商学院	男
3	3	3	4	4	4	4	3	2022级	农村	国际语言学院	女
3	3	3	3	3	3	3	3	2022级	城镇	影视与艺术设计学院	男
3	3	3	3	3	3	3	3	2022级	农村	国际语言学院	女
3	3	3	3	3	3	3	3	2022级	城镇	影视与艺术设计学院	女
3	3	3	3	3	3	3	3	2022级	农村	商学院	女
3	3	4	3	4	3	4	3	2022级	城镇	影视与艺术设计学院	男
4	4	4	4	4	4	4	4	2022级	城镇	电气信息学院	女
4	4	4	4	4	4	4	4	2022级	城镇	商学院	女
4	4	4	4	4	4	4	4	2022级	农村	电气信息学院	男
5	5	5	4	4	4	4	4	2022级	农村	国际语言学院	女
3	3	4	4	3	2	4	4	2022级	城镇	影视与艺术设计学院	女
3	3	3	3	3	3	3	3	2022级	农村	影视与艺术设计学院	男
3	4	3	3	3	3	3	4	2022级	城镇	影视与艺术设计学院	女
3	3	3	3	4	3	4	3	2022级	农村	影视与艺术设计学院	男
3	3	1	2	1	1	2	1	2022级	城镇	影视与艺术设计学院	男
3	3	3	3	3	3	3	3	2022级	农村	影视与艺术设计学院	女
5	5	5	5	5	5	5	5	2022级	农村	国际语言学院	女
3	3	4	3	4	3	4	3	2022级	农村	影视与艺术设计学院	女
4	4	4	4	4	4	4	4	2022级	农村	国际语言学院	女
3	3	3	3	3	3	3	3	2021级	农村	国际语言学院	女
4	4	4	4	4	4	4	4	2022级	农村	国际语言学院	女
3	3	3	3	3	3	3	3	2022级	农村	国际语言学院	女
4	4	3	3	4	3	4	3	2022级	农村	国际语言学院	男
3	3	3	3	3	3	4	3	2022级	农村	工学院	女
3	3	3	3	3	3	3	3	2022级	农村	电气信息学院	女
3	3	3	3	3	3	3	3	2022级	城镇	工学院	男
3	3	3	3	3	3	3	3	2022级	农村	工学院	女
4	4	4	4	4	4	4	4	2022级	农村	工学院	女
3	3	3	3	3	3	3	3	2022级	城镇	电气信息学院	女
4	2	3	4	3	2	3	4	2022级	农村	影视与艺术设计学院	男
3	3	3	3	3	3	3	3	2022级	农村	电气信息学院	女
3	3	3	3	3	3	3	3	2022级	农村	电气信息学院	女
3	3	3	3	3	3	3	3	2022级	农村	电气信息学院	女
3	3	3	3	3	3	3	3	2022级	农村	电气信息学院	女
1	1	2	2	2	3	3	3	2019级	城镇	工学院	男
2	4	3	3	3	3	3	3	2022级	农村	影视与艺术设计学院	女
3	4	3	3	4	3	4	3	2022级	农村	影视与艺术设计学院	女
3	3	3	3	4	3	4	3	2022级	农村	工学院	女
4	4	4	4	4	4	4	4	2022级	城镇	影视与艺术设计学院	女
3	3	3	3	3	3	3	3	2022级	农村	影视与艺术设计学院	女
5	5	4	5	4	5	4	4	2022级	农村	电气信息学院	男
3	3	3	3	3	3	3	3	2022级	农村	工学院	女
4	4	3	4	3	4	3	4	2022级	农村	工学院	男
3	3	3	3	3	3	3	3	2022级	农村	工学院	女
2	2	2	2	2	2	2	2	2022级	农村	商学院	女
4	3	2	2	3	3	3	3	2022级	农村	电气信息学院	女
4	2	4	4	3	3	4	4	2022级	农村	国际语言学院	女
4	4	4	4	4	4	2	4	2022级	城镇	工学院	男
3	3	2	3	3	3	3	3	2022级	农村	影视与艺术设计学院	男
4	4	4	4	4	4	4	4	2022级	农村	影视与艺术设计学院	女
4	4	4	4	4	4	4	4	2022级	农村	工学院	女
3	3	3	3	3	3	3	3	2022级	农村	电气信息学院	男
3	3	3	3	3	3	3	3	2022级	农村	影视与艺术设计学院	男
3	3	3	3	3	3	3	3	2022级	农村	电气信息学院	女
3	3	3	3	3	3	3	3	2022级	农村	影视与艺术设计学院	女
4	4	4	4	4	4	4	4	2022级	城镇	影视与艺术设计学院	女
4	4	4	3	4	3	4	3	2022级	农村	工学院	男
3	4	4	3	4	4	4	4	2022级	农村	国际语言学院	女
4	4	4	4	3	3	4	4	2022级	城镇	工学院	男
3	3	3	3	3	3	3	3	2022级	城镇	影视与艺术设计学院	女
4	4	4	4	3	4	3	4	2022级	农村	电气信息学院	男
4	4	4	4	4	4	4	4	2022级	农村	影视与艺术设计学院	女
4	4	4	4	4	4	4	4	2022级	农村	影视与艺术设计学院	女
4	4	4	4	4	3	3	4	2022级	城镇	影视与艺术设计学院	女
3	3	3	3	3	3	3	3	2022级	农村	影视与艺术设计学院	女
4	4	4	4	4	4	4	4	2022级	农村	工学院	女
4	4	4	4	4	4	4	4	2022级	农村	工学院	女
3	3	3	3	3	3	3	3	2022级	农村	影视与艺术设计学院	女
4	4	4	4	4	4	4	4	2022级	城镇	影视与艺术设计学院	男
4	4	4	4	4	4	4	4	2022级	农村	工学院	男
4	3	3	4	3	2	3	3	2022级	城镇	工学院	男
3	3	3	3	3	3	3	3	2022级	农村	电气信息学院	男
3	3	3	3	3	3	3	3	2022级	农村	电气信息学院	男
3	3	3	3	3	3	3	3	2022级	农村	电气信息学院	男
4	4	4	5	5	5	4	2	2022级	农村	商学院	女
2	4	5	4	3	2	2	3	2022级	农村	工学院	男
3	3	4	3	4	3	4	3	2022级	农村	电气信息学院	女
3	3	4	3	3	3	3	3	2022级	农村	商学院	女
3	2	2	2	2	2	2	2	2022级	农村	影视与艺术设计学院	女
3	3	4	4	3	4	3	4	2022级	农村	工学院	男
4	4	4	4	4	3	3	3	2022级	农村	影视与艺术设计学院	女
4	4	4	4	4	4	3	2	2022级	农村	工学院	女
3	3	3	3	3	3	3	3	2022级	城镇	商学院	女
3	3	3	4	3	4	4	4	2022级	农村	工学院	女
4	4	4	3	2	3	3	3	2022级	农村	工学院	女
3	3	4	3	4	3	4	4	2022级	农村	国际语言学院	女
3	3	3	3	3	3	3	3	2022级	农村	商学院	女
4	3	3	3	3	3	3	3	2022级	城镇	国际语言学院	女
4	2	3	3	4	3	4	3	2022级	农村	商学院	女
3	3	3	3	3	3	3	3	2022级	农村	商学院	男
5	5	5	5	5	5	5	5	2022级	城镇	影视与艺术设计学院	女
2	2	2	2	2	2	2	2	2022级	城镇	国际语言学院	女
3	3	3	3	3	3	3	3	2022级	农村	国际语言学院	女
4	4	4	4	3	4	3	4	2022级	农村	电气信息学院	女
3	3	3	3	3	3	3	3	2022级	农村	工学院	女
3	3	3	3	3	3	3	3	2022级	农村	电气信息学院	女
3	3	3	3	4	3	4	3	2022级	农村	工学院	女
3	3	3	3	3	3	3	3	2022级	农村	工学院	女
4	4	4	3	3	4	3	4	2022级	农村	国际语言学院	女
5	5	5	5	5	5	5	5	2022级	城镇	影视与艺术设计学院	女
3	3	3	3	3	3	3	3	2022级	农村	工学院	男
3	3	3	3	3	3	3	3	2022级	农村	国际语言学院	女
3	3	3	3	3	3	3	3	2022级	农村	体育学院	男
3	3	3	3	3	3	3	3	2022级	农村	国际语言学院	女
3	3	3	3	3	3	3	3	2022级	农村	国际语言学院	女
3	3	3	3	3	3	3	3	2022级	农村	国际语言学院	女
4	3	4	3	3	3	4	3	2022级	城镇	国际语言学院	女
3	4	3	3	3	3	3	3	2022级	农村	国际语言学院	女
3	3	3	3	3	3	3	3	2022级	农村	国际语言学院	女
4	4	4	4	4	4	4	4	2022级	农村	国际语言学院	女
3	3	3	3	3	3	3	3	2022级	农村	国际语言学院	女
3	3	3	3	3	3	3	3	2022级	农村	国际语言学院	女
3	3	3	3	3	3	3	3	2022级	农村	国际语言学院	女
4	4	3	4	5	4	4	4	2022级	城镇	国际语言学院	女
3	3	3	3	3	3	3	3	2022级	农村	国际语言学院	女
2	4	4	3	3	3	3	3	2022级	农村	国际语言学院	女
4	3	3	3	3	3	3	3	2022级	农村	国际语言学院	女
4	4	4	4	4	4	4	4	2022级	农村	国际语言学院	女
3	3	3	3	3	3	3	3	2022级	农村	国际语言学院	女
4	2	3	2	3	4	3	3	2022级	农村	电气信息学院	女
4	4	4	4	4	4	4	4	2022级	城镇	电气信息学院	男
4	3	4	4	3	5	4	3	2022级	城镇	电气信息学院	女
3	4	4	3	3	4	4	3	2022级	农村	工学院	女
4	4	3	4	4	4	4	4	2022级	农村	国际语言学院	女
3	3	3	4	4	4	4	4	2022级	农村	体育学院	女
5	5	5	5	5	5	5	5	2022级	农村	工学院	女
4	4	4	4	3	4	3	4	2022级	城镇	工学院	女
3	3	3	5	5	5	5	5	2022级	农村	商学院	女
3	3	3	3	3	3	3	3	2022级	农村	电气信息学院	男
3	3	3	3	3	3	3	3	2022级	农村	电气信息学院	男
3	3	3	3	3	3	3	3	2022级	农村	影视与艺术设计学院	男
4	4	4	4	4	4	4	4	2022级	农村	影视与艺术设计学院	女
4	4	4	4	4	4	4	4	2022级	农村	影视与艺术设计学院	男
3	3	3	3	3	3	3	3	2022级	农村	影视与艺术设计学院	女
3	3	3	3	3	3	3	3	2022级	农村	影视与艺术设计学院	男
4	4	4	4	3	3	3	3	2022级	农村	影视与艺术设计学院	女
4	4	4	3	4	3	4	4	2022级	城镇	影视与艺术设计学院	男
3	3	3	3	3	3	3	3	2022级	城镇	影视与艺术设计学院	女
5	5	4	5	4	5	5	4	2022级	城镇	影视与艺术设计学院	女
3	3	3	3	3	3	4	3	2022级	农村	影视与艺术设计学院	女
3	3	3	3	3	3	3	3	2022级	农村	影视与艺术设计学院	女
3	3	3	3	3	3	3	3	2022级	农村	电气信息学院	女
3	4	2	4	3	3	3	4	2022级	农村	电气信息学院	男
5	5	5	5	5	5	5	5	2022级	农村	商学院	男
4	4	4	4	4	4	4	4	2022级	农村	影视与艺术设计学院	女
3	3	3	3	3	3	3	3	2022级	农村	影视与艺术设计学院	女
4	4	4	4	4	4	4	4	2022级	农村	商学院	男
3	3	3	3	3	3	3	3	2022级	农村	商学院	女
3	3	3	3	3	3	3	3	2022级	城镇	影视与艺术设计学院	女
3	3	3	3	3	3	3	3	2022级	农村	商学院	女
3	3	3	3	3	3	3	3	2022级	农村	工学院	女
3	3	3	3	3	3	3	3	2022级	农村	电气信息学院	女
4	4	4	4	3	4	4	4	2022级	城镇	影视与艺术设计学院	男
4	4	4	4	3	4	2	4	2022级	农村	影视与艺术设计学院	男
3	3	3	3	3	3	3	3	2022级	农村	影视与艺术设计学院	男
3	3	3	3	3	3	3	3	2022级	农村	影视与艺术设计学院	女
3	3	3	3	3	3	3	3	2022级	农村	影视与艺术设计学院	男
3	3	3	3	3	3	3	3	2022级	农村	影视与艺术设计学院	男
3	2	3	4	3	4	3	4	2022级	农村	影视与艺术设计学院	男
3	3	3	3	3	3	3	3	2022级	农村	影视与艺术设计学院	男
5	5	5	5	5	5	5	5	2022级	农村	电气信息学院	男
4	4	4	3	3	3	3	3	2022级	农村	电气信息学院	女
3	3	3	3	3	3	3	3	2022级	农村	国际语言学院	女
4	4	3	3	3	4	3	2	2022级	农村	商学院	女
4	4	4	4	4	4	4	4	2022级	农村	影视与艺术设计学院	女
4	1	1	5	5	5	5	5	2022级	农村	影视与艺术设计学院	女
5	5	5	5	5	5	5	5	2022级	农村	商学院	女
3	3	3	3	3	3	3	3	2022级	农村	商学院	女
4	4	4	4	4	4	4	4	2022级	农村	体育学院	男
4	4	4	4	4	4	4	4	2022级	农村	国际语言学院	女
3	3	3	3	3	3	3	3	2022级	城镇	国际语言学院	女
3	3	3	3	3	3	3	3	2022级	农村	电气信息学院	女
3	3	3	3	3	3	3	3	2022级	农村	国际语言学院	女
4	4	4	4	4	4	4	4	2022级	城镇	电气信息学院	女
4	4	4	4	4	4	4	4	2022级	城镇	电气信息学院	女
3	3	3	3	3	3	3	3	2022级	农村	影视与艺术设计学院	女
3	3	3	3	3	3	3	3	2022级	农村	影视与艺术设计学院	女
3	3	3	3	3	3	3	3	2022级	城镇	影视与艺术设计学院	女
3	3	3	3	3	3	3	3	2022级	农村	影视与艺术设计学院	女
3	3	3	3	3	3	3	3	2022级	农村	影视与艺术设计学院	女
4	4	4	3	4	4	4	4	2022级	农村	商学院	女
3	3	3	3	4	3	2	3	2022级	农村	工学院	女
3	3	3	3	3	3	3	3	2022级	农村	商学院	女
4	4	4	3	3	3	3	3	2022级	城镇	国际语言学院	女
3	3	3	3	3	3	3	3	2022级	城镇	工学院	女
3	3	3	3	3	3	3	3	2022级	农村	电气信息学院	女
3	3	3	3	3	3	3	3	2022级	农村	电气信息学院	女
4	4	4	4	4	4	4	4	2022级	农村	工学院	男
3	3	3	3	3	3	3	3	2022级	农村	工学院	男
3	3	3	4	4	4	3	3	2022级	农村	工学院	男
4	4	4	4	4	4	3	4	2022级	农村	工学院	女
4	4	4	3	3	3	3	3	2022级	农村	工学院	男
4	4	4	4	4	4	4	4	2022级	城镇	工学院	男
4	4	4	4	4	4	4	4	2022级	农村	工学院	男
3	3	3	3	3	3	3	3	2022级	农村	电气信息学院	男
3	3	3	3	3	3	3	3	2022级	城镇	电气信息学院	男
4	4	4	3	4	3	3	3	2022级	城镇	电气信息学院	男
3	3	3	3	3	3	3	3	2022级	农村	电气信息学院	男
2	3	4	4	3	2	3	3	2022级	城镇	国际语言学院	女
5	5	5	5	5	5	5	5	2022级	农村	商学院	女
2	3	2	3	2	2	2	2	2022级	农村	电气信息学院	男
3	3	3	3	3	3	3	3	2022级	农村	工学院	女
3	3	3	3	3	3	3	3	2022级	农村	国际语言学院	女
4	4	4	4	4	4	4	4	2022级	农村	影视与艺术设计学院	女
4	4	4	4	4	4	4	4	2020级	农村	国际语言学院	女
3	3	3	3	3	3	3	3	2022级	农村	影视与艺术设计学院	女
3	3	3	3	3	3	3	3	2022级	城镇	商学院	女
3	3	4	3	4	3	4	3	2022级	城镇	工学院	男
4	4	4	4	4	4	4	4	2022级	农村	商学院	女
3	3	3	3	3	3	3	3	2022级	农村	电气信息学院	男
3	4	3	4	3	4	3	4	2022级	农村	商学院	女
4	4	4	4	4	4	4	4	2022级	农村	电气信息学院	女
4	5	4	5	4	4	4	5	2022级	农村	工学院	男
3	3	3	3	3	3	3	3	2022级	农村	国际语言学院	女
3	3	4	3	4	3	4	3	2022级	城镇	国际语言学院	女
4	4	4	3	3	3	4	3	2022级	农村	国际语言学院	女
3	3	3	3	3	3	3	3	2022级	农村	体育学院	男
5	5	5	5	5	5	5	5	2022级	城镇	国际语言学院	女
4	4	3	4	3	4	3	4	2022级	农村	工学院	男
3	3	3	3	3	3	3	3	2022级	城镇	体育学院	女
5	5	5	5	5	5	5	5	2022级	农村	影视与艺术设计学院	男
3	3	3	4	3	4	3	4	2022级	农村	国际语言学院	女
3	3	3	3	3	3	3	3	2022级	城镇	影视与艺术设计学院	女
4	4	4	4	4	4	4	4	2022级	城镇	国际语言学院	女
4	4	4	4	4	4	4	4	2022级	农村	国际语言学院	女
4	4	4	3	3	3	3	3	2022级	农村	国际语言学院	女
3	3	3	3	3	3	3	3	2022级	农村	电气信息学院	女
2	4	4	3	3	3	3	3	2022级	农村	国际语言学院	女
4	4	4	4	3	4	3	4	2022级	农村	体育学院	女
3	4	4	4	4	4	4	4	2022级	农村	体育学院	女
3	3	3	3	4	3	3	3	2022级	农村	商学院	女
3	3	3	3	3	3	3	3	2022级	农村	国际语言学院	女
3	3	3	4	4	4	4	4	2022级	农村	国际语言学院	女
3	3	3	3	3	3	3	3	2022级	农村	工学院	女
4	4	4	4	4	4	4	4	2022级	农村	国际语言学院	女
1	1	1	1	1	1	1	1	2022级	城镇	影视与艺术设计学院	女
1	1	1	3	3	3	4	3	2022级	农村	电气信息学院	女
2	2	2	3	3	4	4	3	2022级	农村	电气信息学院	女
3	3	3	3	3	3	3	3	2022级	农村	国际语言学院	女
4	4	4	4	4	4	4	4	2022级	农村	国际语言学院	女
3	3	3	3	3	3	3	3	2022级	农村	国际语言学院	女
3	3	3	3	3	3	3	3	2022级	农村	国际语言学院	女
3	3	3	3	3	3	3	3	2022级	农村	影视与艺术设计学院	女
3	3	3	3	3	3	3	3	2022级	农村	影视与艺术设计学院	女
3	3	3	3	3	3	3	3	2022级	城镇	电气信息学院	男
4	3	3	3	3	3	3	3	2022级	农村	工学院	女
2	2	3	3	2	3	2	3	2022级	农村	工学院	男
3	3	3	3	3	3	3	3	2022级	农村	商学院	女
5	4	4	5	5	5	5	4	2020级	农村	国际语言学院	女
3	3	4	3	3	3	3	3	2022级	农村	体育学院	女
3	3	3	3	3	3	3	3	2022级	城镇	国际语言学院	女
4	4	4	4	4	4	4	4	2022级	农村	影视与艺术设计学院	女
3	4	3	3	3	3	3	3	2022级	农村	影视与艺术设计学院	女
4	4	3	3	4	5	4	3	2022级	城镇	影视与艺术设计学院	女
3	3	3	3	3	3	3	3	2022级	农村	工学院	女
3	3	3	3	3	3	3	3	2022级	农村	影视与艺术设计学院	女
3	3	3	3	4	3	3	3	2022级	农村	电气信息学院	男
3	3	3	3	3	3	3	3	2022级	城镇	电气信息学院	女
3	3	3	4	3	4	3	4	2022级	农村	电气信息学院	女
3	3	3	3	3	3	3	3	2022级	农村	国际语言学院	女
4	2	4	2	3	1	2	2	2022级	城镇	电气信息学院	男
3	3	4	4	4	4	4	4	2022级	农村	影视与艺术设计学院	女
3	3	3	3	3	3	3	3	2022级	城镇	电气信息学院	女
4	4	3	3	4	3	2	3	2022级	农村	影视与艺术设计学院	男
2	2	2	2	2	2	2	2	2022级	农村	体育学院	女
3	4	4	2	2	2	2	2	2022级	农村	国际语言学院	女
3	3	3	3	3	3	3	3	2022级	农村	体育学院	男
3	3	3	3	3	3	3	3	2022级	农村	电气信息学院	女
5	5	5	4	4	4	4	4	2022级	农村	工学院	男
3	3	3	3	3	3	3	3	2022级	农村	工学院	男
4	4	4	4	4	4	4	4	2022级	城镇	国际语言学院	女
